# Supplementary material
Source: publisher figshare collection journal article supplement (https://karger.figshare.com/ndownloader/files/8712529)
Supplement: Supplementary file 1 [file 8712529]

**Supplementary Table 1.** Tumor response according to primary tumor site.

| Primary tumor site | GP | XP | *p*-value |
| --- | --- | --- | --- |
| Intrahepatic cholangiocarcinoma | N = 51 (%) | N = 103 (%) |  |
| Response rate | 11 (21.6) | 19 (18.4) | 0.669 |
| Disease control rate | 38 (74.5) | 64 (62.1) | 0.149 |
| Gallbladder cancer | N = 52 (%) | N = 59 (%) |  |
| Response rate | 11 (21.2) | 9 (15.3) | 0.846 |
| Disease control rate | 31 (59.6) | 37 (62.7) | 0.444 |
| Extrahepatic cholangiocarcinoma | N = 10 (%) | N = 17 (%) |  |
| Response rate | 1 (10.0) | 2 (11.8) | 1.000 |
| Disease control rate | 7 (70.0) | 10 (58.8) | 0.692 |
